# Supplementary material for: Specific chromatin changes mark lateral organ founder cells in the Arabidopsis inflorescence meristem
Source: PubMed Central journal article supplement — J Exp Bot. 2019 Apr 30;70(15):3867–79. doi: 10.1093/jxb/erz181 (PMC6685650; doi:10.1093/jxb/erz181), 2019-04-30
Supplement: erz181_suppl_supplementary_figures_s1-s4_tables_s1-s3.pdf [file erz181_suppl_supplementary_figures_s1-s4_tables_s1-s3.pdf]

## Supplementary data

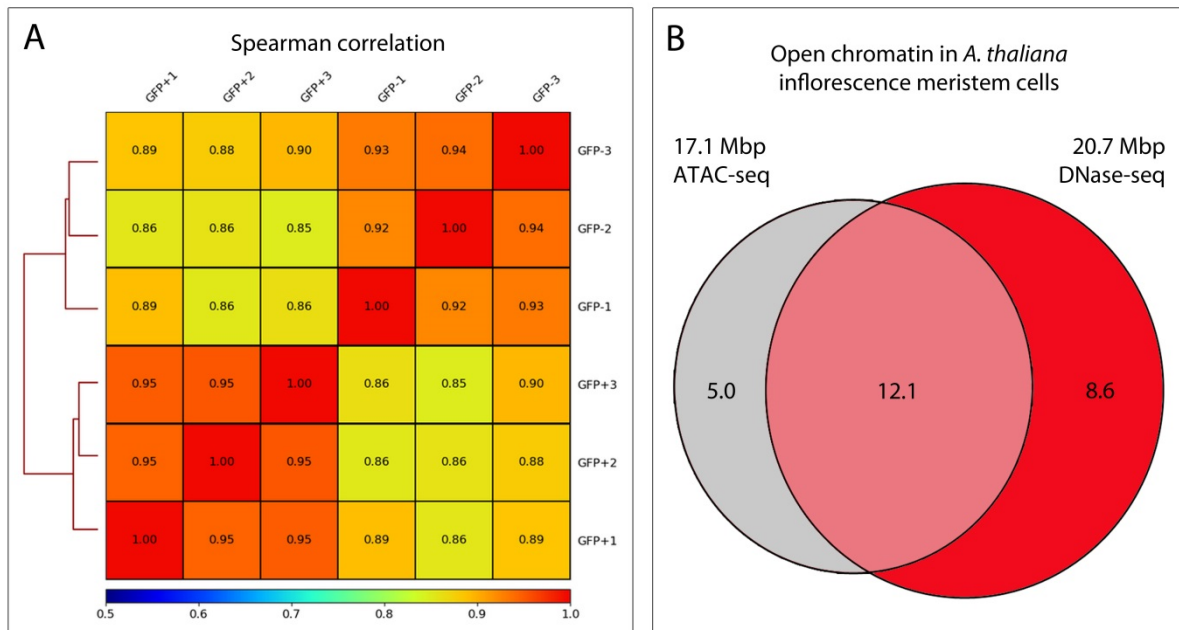

**Figure S1. Comparison of biological replicates within the ATAC-seq analysis and overlap with available DNase-seq data**

**A)** Spearman correlation of THSs between the three biological replicates and the GFP+ LOFCs and GFP- meristematic cells. **B)** Open chromatin regions in *ap1 cal* inflorescence meristem cells detected by ATAC-seq (grey) or DNase-seq (red) according to Pajoro *et al.* (2014); note the central 12.1 Mbp overlap (70 or 58%). (Mbp = megabase pairs).

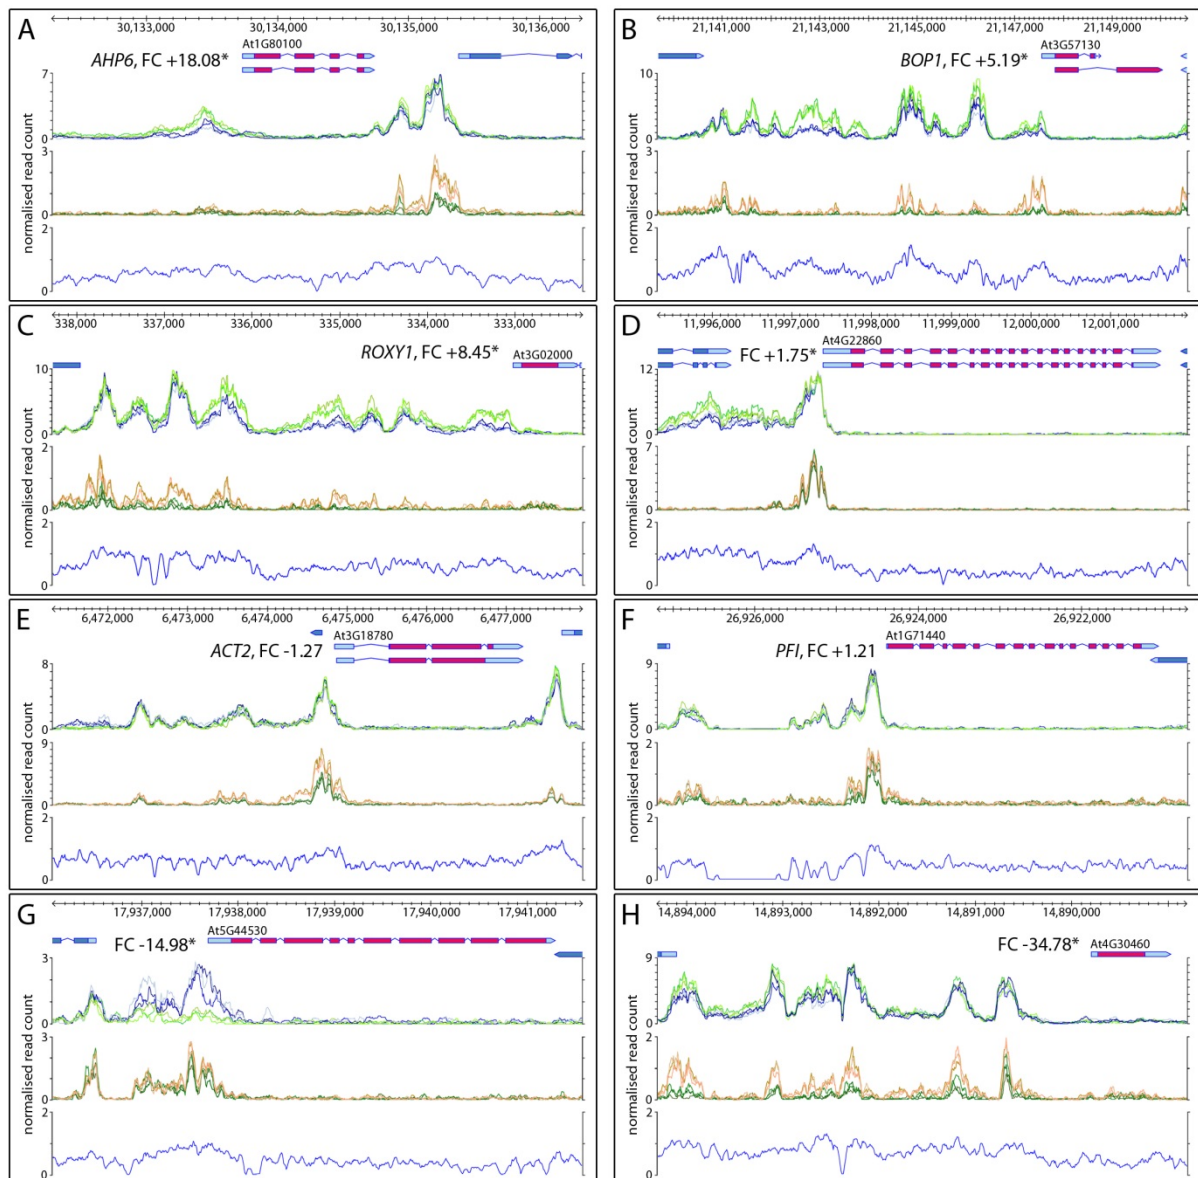

**Figure S2. Comparison of the chromatin configurations of exemplary genes between ATAC-seq and DNase-seq, different cell types and enrichment methods**

This comparison relates to Fig. 3 and genes extensively discussed in the main text. **A) AHP6, B) BOP1, C) ROXY1, D) At4g22860, E) ACT2, F) PFI, G) At5g44530 and H) At4g30460.** It outlines experimental differences between the enrichment of protoplasts via FACS (top) or nuclei by the INTACT method (centre) or between peak calling in ATAC-seq and DNase-seq data in the *ap1 cal* IM (bottom). The Y-axis depicts normalised read counts and differs in scale between examples. The graphs depict mean values from three biological ATAC-seq replicates of GFP+ (green) and GFP- (blue) *ap1 cal* inflorescence meristem cells in the upper panels, vegetative stem (orange) and mesophyll (green) cells (Sijacic *et al.*, 2018) in the central panels and two biological replicates of *ap1 cal* IM chromatin subjected to DNaseI digestion (lower panels) (Pajoro *et al.*, 2014). Note that the DNase data replicates were mapped as a pool due to the submission format of the data. Gene locus descriptions exactly follow the legend for Fig. 3 in the main text.

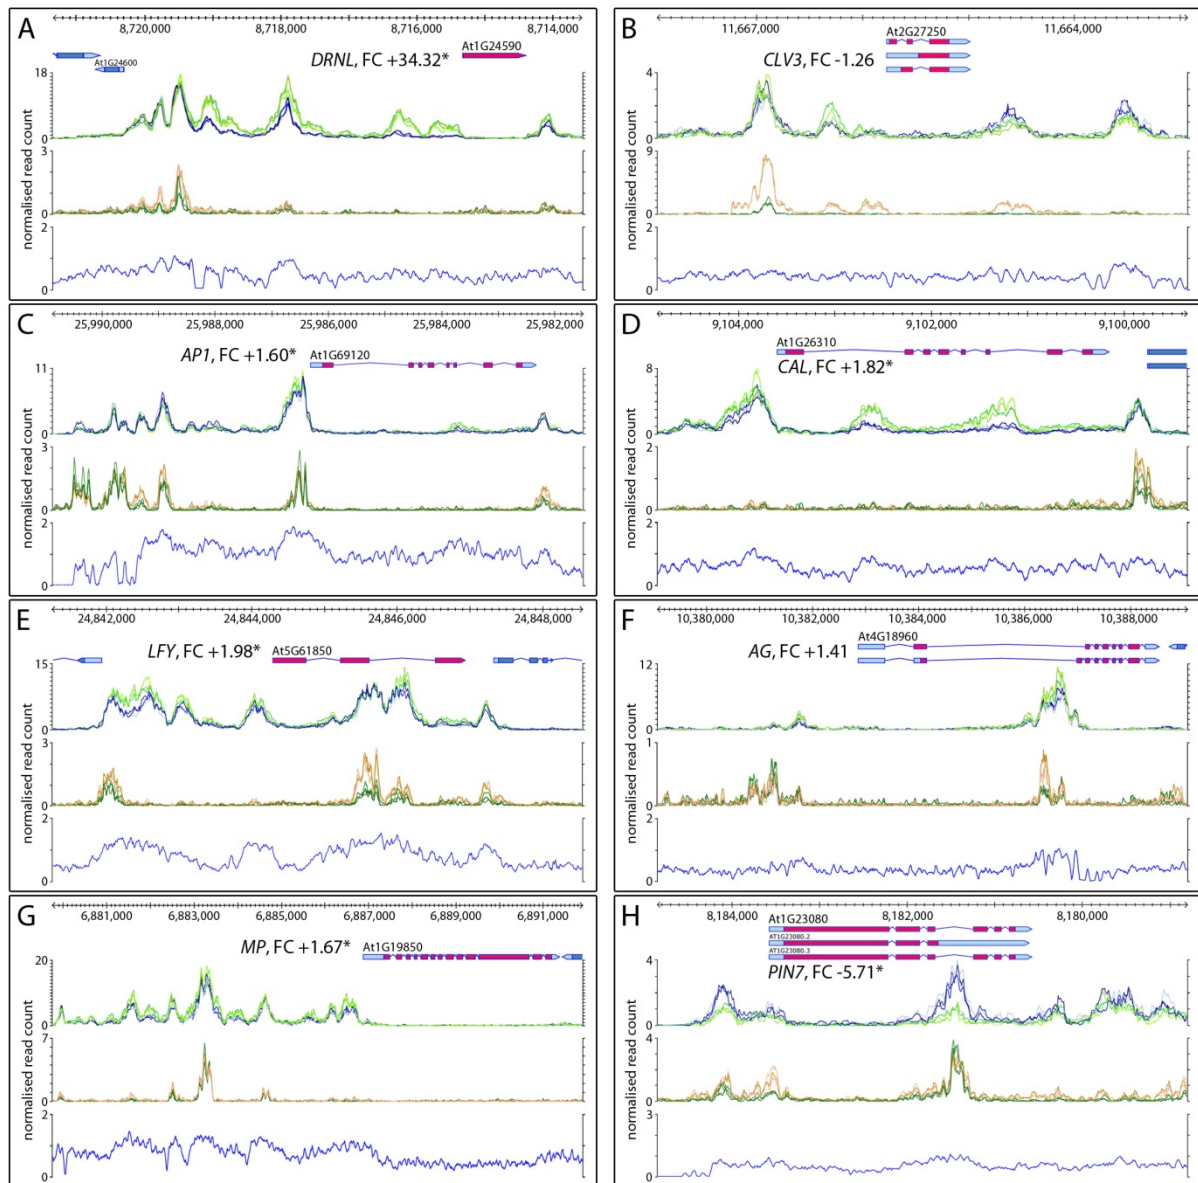

**Figure S3. DNase-seq accessibility in genes and promoters used for cell type-specific enrichment or relating to developmental decisions**

This figure provides DNase-seq data for individual genes in Fig. 5. **A)** *DRNL*, **B)** *CLV3*, **C)** *AP1*, **D)** *CAL*, **E)** *LFY*, **F)** *AG*, **G)** *MP* and **H)** *PIN7*. The arrangement of panels and colour code are the same as in supplementary Fig. S2. Note the different scale on the Y-axis between *DRNL* and *CLV3* with respect to LOFC- or stem cell-specificity and that peak calling in the DNase-seq data, similar to Fig. S2, results in poor peak resolution and a low signal-to-noise ratio.

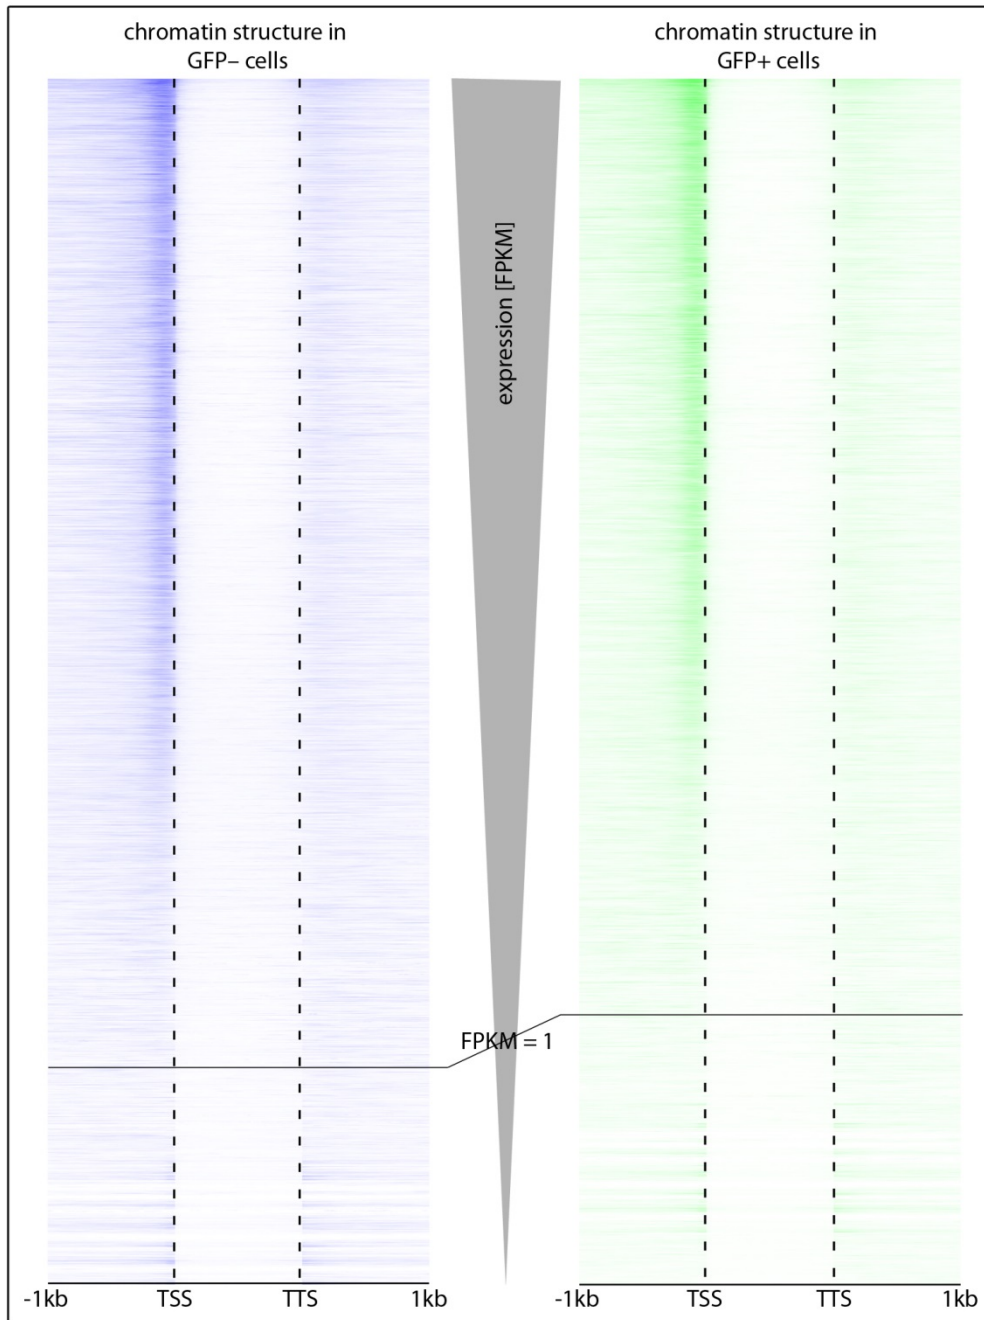

**Figure S4. Correlation between ATAC-signal and gene expression**

ATAC-seq signal distribution in GFP- (blue) and GFP+ (green) cells for all *Arabidopsis* genes sorted by increasing FPKM (Fragments Per Kilobase Million) values according to Frerichs *et al.* (2016).

**Table S1. ATAC-seq read numbers compared to DNase-seq data**

ATAC-seq read numbers in GFP+ and GFP– cells in the three biological replicates (1–3). Indicated are all reads mapping to the *Arabidopsis* genome, reads after removal of duplicates (deduplicated reads), reads mapping to the five *Arabidopsis* chromosomes excluding organelles (chromosomal reads) and their fraction relative to the mapped or deduplicated reads, respectively. The bottom row represents processed data according to Pajoro *et al.* (2014); note that the chromosomal read number substantially exceeds numbers in the individual ATAC-seq samples.

|               | <b>Mapped reads</b> | <b>Deduplicated reads</b> | <b>Deduplicated [%]</b> | <b>Chromosomal reads</b> | <b>Chromosomal reads [%]</b> |
|---------------|---------------------|---------------------------|-------------------------|--------------------------|------------------------------|
| <b>GFP+ 1</b> | 84,933,731          | 41,091,888                | 48.4                    | 23,694,985               | 57.7                         |
| <b>GFP– 1</b> | 82,537,762          | 41,196,912                | 49.9                    | 25,662,021               | 62.3                         |
| <b>GFP+ 2</b> | 96,093,332          | 46,976,856                | 48.9                    | 29,838,420               | 63.5                         |
| <b>GFP– 2</b> | 47,580,369          | 28,670,807                | 60.3                    | 17,308,268               | 60.4                         |
| <b>GFP+ 3</b> | 86,514,402          | 42,407,978                | 49.0                    | 24,708,662               | 58.3                         |
| <b>GFP– 3</b> | 89,808,530          | 44,347,953                | 49.4                    | 27,084,948               | 61.1                         |
| <b>DNase</b>  | -                   | 45,130,287                | 28.4                    | 44,137,107               | 97.8                         |

**Table S2. Statistical evaluation of dTHS relative to DEGs**

The DEGs were taken according to Frerichs *et al.* (2016). Set1 consists of THS-up or THS-down; Set2 represents up- (717) or downregulated (3,356) DEGs. The column overlap indicates the fraction of Set 1 that overlaps with Set 2, the percentage [%] is calculated relative to Set1, i.e., THSs-up or down. Over- or under-representation and  $p$ -values were calculated assuming a total number of 28,496 *Arabidopsis* genes and a hypergeometric distribution.

| Comparison (Set1/Set2)    | Set 1 | Set 2 | Over-lap | [%]   | Over/Under-representation | $p$ value |
|---------------------------|-------|-------|----------|-------|---------------------------|-----------|
| dTHS-up/expression up     | 121   | 717   | 37       | 30.6% | Over                      | 6.556E-30 |
| dTHS-up/expression down   | 121   | 3,356 | 3        | 2.5%  | Under                     | 0.0002118 |
| dTHS-down/expression up   | 392   | 717   | 1        | 0.3%  | Under                     | 0.0004817 |
| dTHS-down/expression down | 392   | 3,356 | 189      | 48.2% | Over                      | 2.617E-72 |

**Table S3. Representation of GCC-boxes in genes carrying dTHSs and THSs**

The column headings show the total number of GCC-boxes residing within genes (plus 1 kb upstream and downstream) in the *Arabidopsis* genome and distinguishes GCCGCC motifs from motifs allowing one mismatch at positions 2, 3 or 5 (perfect vs. relaxed). The sub-columns indicate motif frequency in genes carrying dTHS-up or dTHS-down, THSs of GFP+ or GFP- protoplasts or all genes and their percentages relative to the THS-category (1) or the number of motifs (2). Note the substantially fewer dTHSs compared to THSs for perfect and relaxed GCC-box sequences. The overlaps here are direct, i.e., genes are considered as overlapping when the motif and the THS/dTHS directly share one or more bases.

|             | 2      | Perfect GCC-boxes: 11,216 |        | Relaxed GCC-boxes: 26,299 |        |        |        |
|-------------|--------|---------------------------|--------|---------------------------|--------|--------|--------|
|             | 1      |                           | % of 1 | % of 2                    |        | % of 1 | % of 2 |
| dTHS-up     | 121    | 5                         | 4.13%  | 0.04%                     | 15     | 12.4%  | 0.06%  |
| dTHS-down   | 392    | 3                         | 0.77%  | 0.03%                     | 39     | 9.9%   | 0.14%  |
| THS<br>GFP+ | 20,736 | 2,807                     | 13.54% | 25.03%                    | 10,243 | 49.4%  | 38.90% |
| THS<br>GFP- | 21,098 | 2,808                     | 13.31% | 25.04%                    | 10,381 | 49.2%  | 39.50% |
| Genome      | 28,496 | 11,216                    | 39.36% | 100.00%                   | 26,299 | 92.3   | 100.00 |
